# Supplementary material for: The Post-Curing of Waterborne Polyurethane–Acrylate Composite Latex with the Dynamic Disulfide-Bearing Crosslinking Agent
Source: MDPI journal article supplement (doi:10.3390/molecules28248122), 2023-12-15
Supplement: s1 [file s1]

# Supporting Information

## **The Post-Curing of Waterborne Polyurethane–Acrylate Composite Latex with the Dynamic Disulfide–Bearing Crosslinking Agent**

Haotian Zhang,<sup>1,2</sup> Rihui Liang,<sup>1,2</sup> Qianshu Wang,<sup>1,2</sup> Wenbo Luan,<sup>1,2</sup> Jun Ye <sup>1,2,\*</sup>

Teng Qiu <sup>1,2,\*</sup> & Xinlin Tuo <sup>3</sup>

1 Key Laboratory of Carbon Fiber and Functional Polymers, Ministry of Education,  
Beijing University of Chemical Technology, Beijing 100029, China

2 Beijing Engineering Research Center of Synthesis and Application of Waterborne  
Polymer, Beijing University of Chemical Technology, Beijing 100029, China

3 Key Laboratory of Advanced Materials (MOE), Department of Chemical  
Engineering, Tsinghua University, Beijing 100084, China

\*Corresponding authors:

Teng Qiu ([qiuteng@mail.buct.edu.cn](mailto:qiuteng@mail.buct.edu.cn)); Jun Ye ([yejun@mail.buct.edu.cn](mailto:yejun@mail.buct.edu.cn))

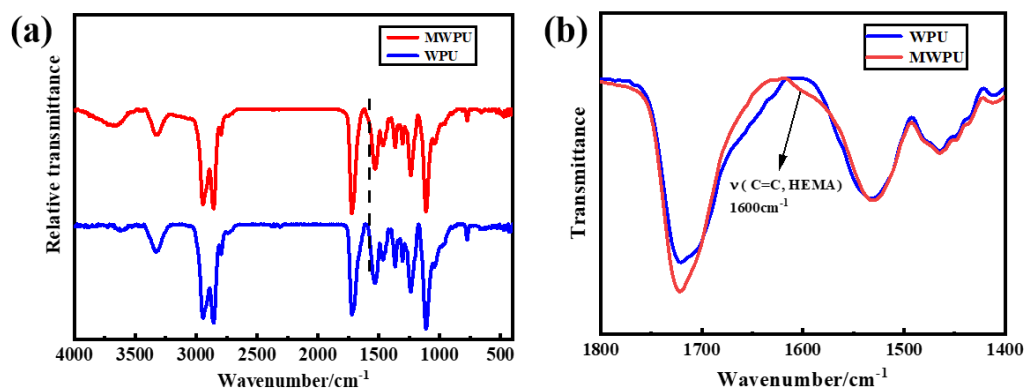

**Figure S1.** (a) The FTIR spectra of MWPU and WPU. (b) The zoom-in spectra of MWPU and WPU.

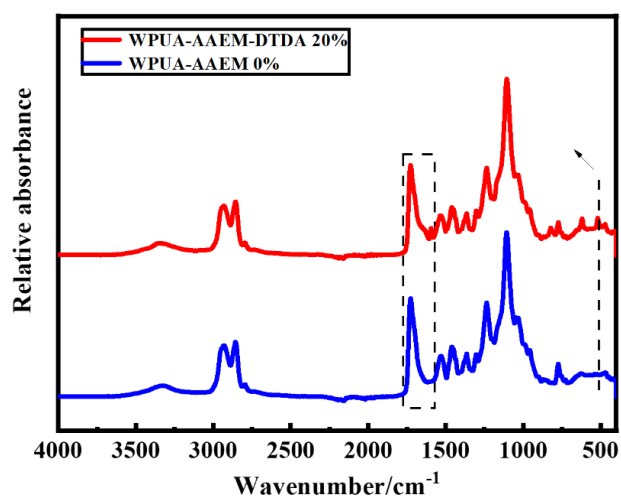

**Figure S2.** ATR-FTIR spectra of WPUA-AAEM 0% and 20% films.

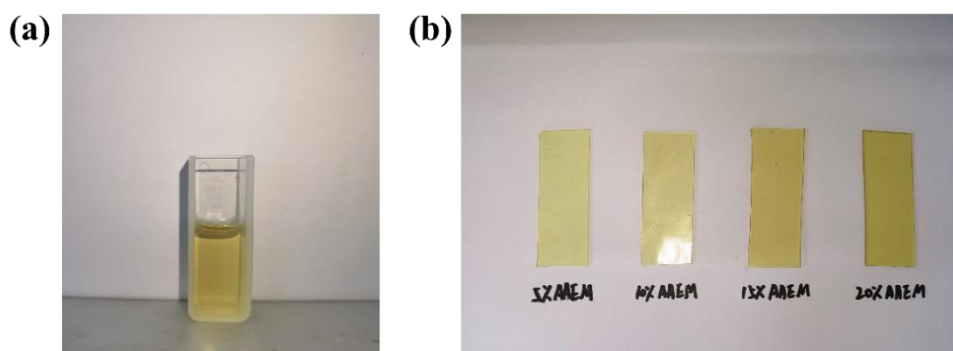

**Figure S3.** (a) The photographs of the ethanol solution of DTDA. (b) The photographs of WPUA-AAEM-DTDA  $x\%$  films.

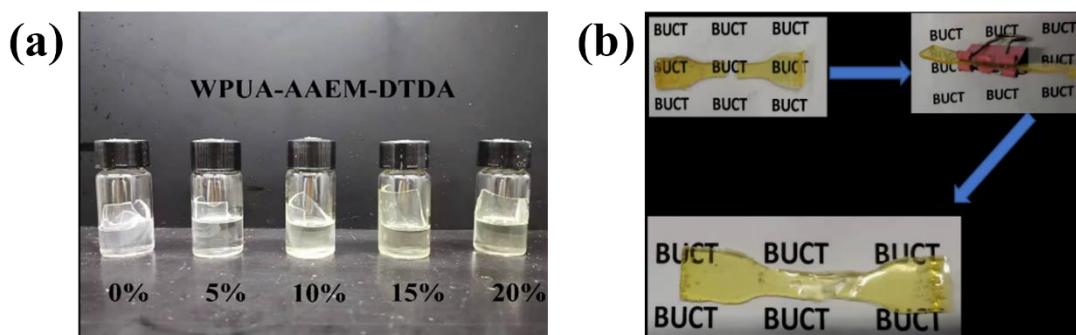

**Figure S4.** (a) The states of WPUA-AAEM-DTDA  $x\%$  films after 24h of immersion in THF. (b) Self-healing process of WPUA-AAEM-DTDA 20% film.

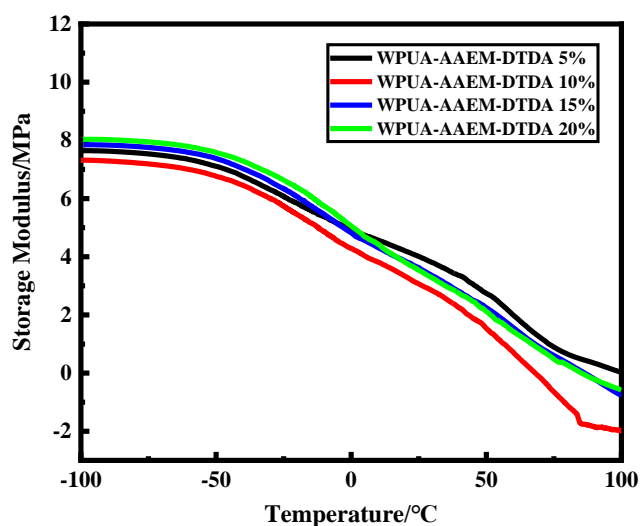

**Figure S5.** Storage modulus-temperature curves of the WPUA-AAEM-DTDA  $x\%$  films.

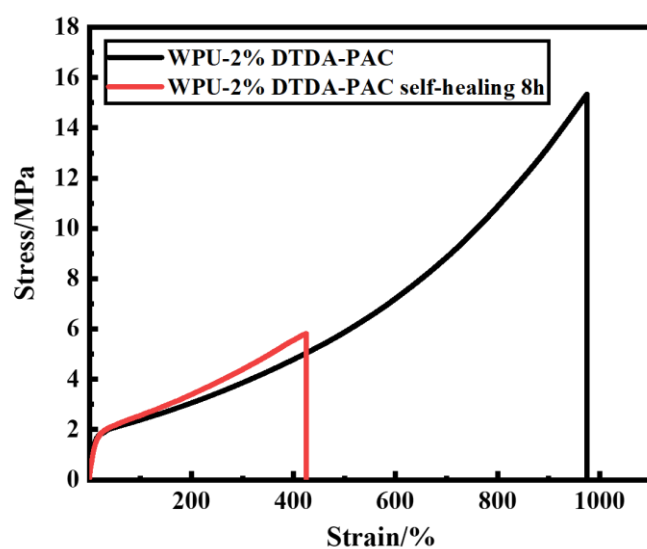

**Figure S6.** Stress-strain curves of the films self-healed at 70°C for 8 hours in comparison with the original films of WPU-2% DTDA-PAC.

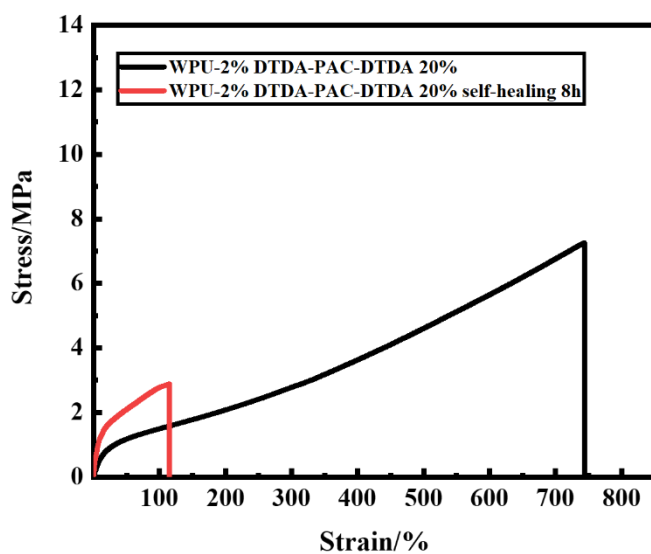

**Figure S7.** Stress-strain curves of the films self-healed at 70°C for 8 hours in comparison with the original films of WPU-2% DTDA-PAC-DTDA 20%.
